# Supplementary material
Source: PubMed Central journal article supplement (PMC5731479)
Supplement: NIHMS903533-supplement-1.pdf [file NIHMS903533-supplement-1.pdf]

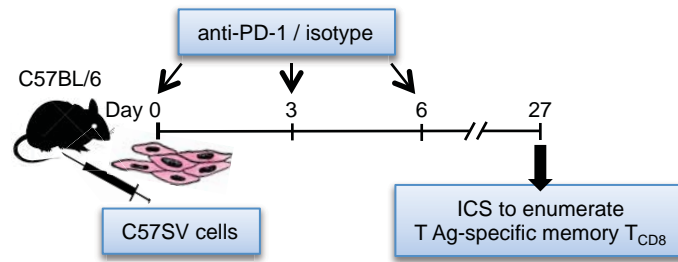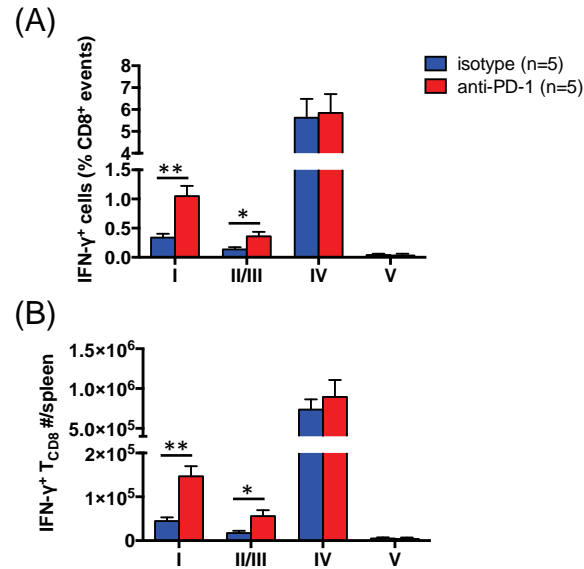

**Supplemental Figure 1.** PD-1 blockade increases both the frequencies and the absolute numbers of subdominant memory T<sub>CD8</sub>. B6 mice were inoculated with C57SV cells and treated with 3 separate doses of an anti-PD-1 mAb or isotype control (n=5 per group). On day 27 post-priming with tumor cells, the percentages (A) and absolute numbers (B) of splenic sites I-, II/III, IV- and V-specific T<sub>CD8</sub> in each spleen were determined by ICS for IFN- $\gamma$ . \* and \*\* denote statistical differences with  $p < 0.05$  and  $p < 0.01$ , respectively.

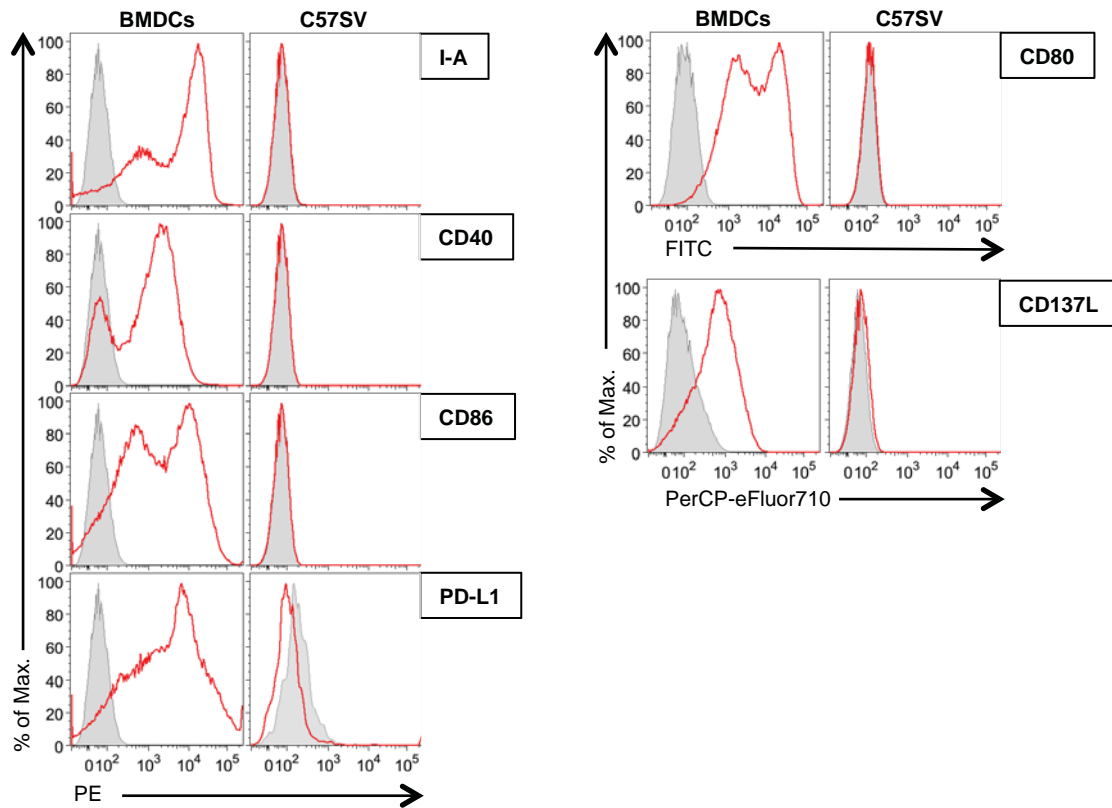

**Supplemental Figure 2.** C57SV fibrosarcoma cells do not express MHC class II and classic costimulatory molecules or PD-L1. C57SV cells were tested by flow cytometry for surface expression of I-A, CD40, CD80, CD86, CD137L and PD-L1. Bone marrow-derived dendritic cells (BMDCs) were also stained in parallel as a positive control. Filled grey and open histograms represent staining with isotype controls and mAbs specific for indicated molecules, respectively.

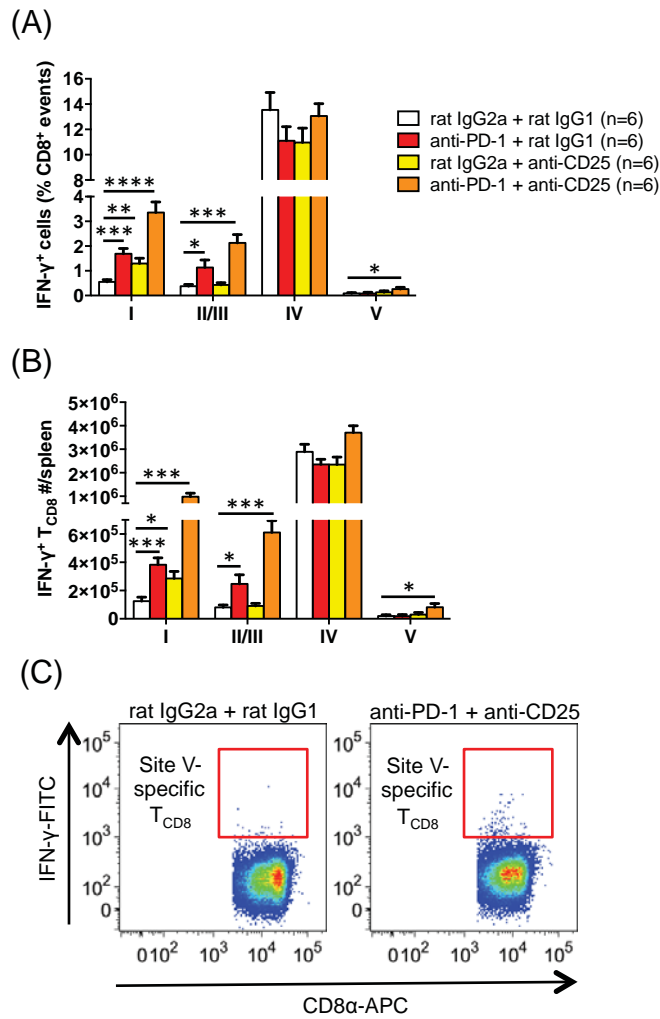

**Supplemental Figure 3.** PD-1 blockade and nTreg cell inactivation strategies can be combined to additively enhance subdominant T Ag-specific T<sub>CD8</sub> responses. B6 mice (n=6 per cohort) were injected with an anti-CD25 mAb (or a rat IgG1 isotype control) 3 days before they were inoculated with C57SV tumor cells. Mice then received separate doses of anti-PD-1 (or a rat IgG2a isotype control). Nine days later, the percentages (A) and absolute numbers (B) of splenic T Ag-specific T<sub>CD8</sub> were determined by ICS for IFN-γ. \*, \*\*, \*\*\* and \*\*\*\* denote statistical differences with  $p < 0.05$  and  $p < 0.01$ ,  $p < 0.001$  and  $p < 0.0001$ , respectively, and error bars represent SEM (A-B). Representative dot plots for site V-specific T<sub>CD8</sub> are also presented (C).

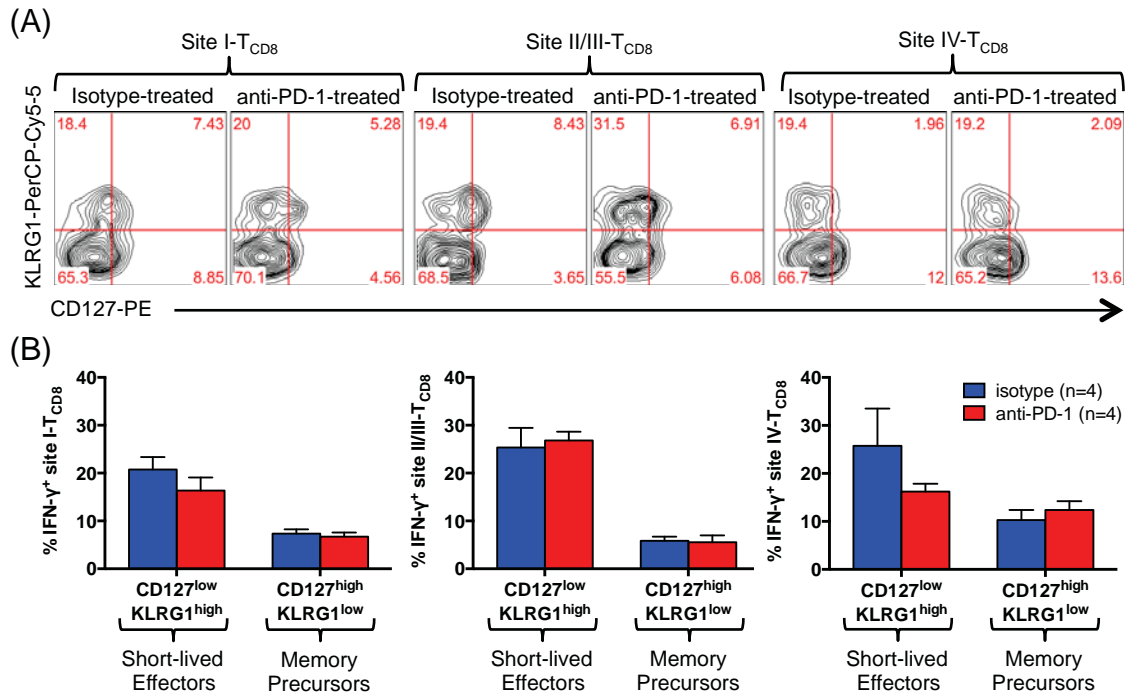

**Supplemental Figure 4.** Short-lived effector and memory precursor frequencies of T Ag-specific T<sub>CD8</sub> are comparable in anti-PD-1- and isotype-treated mice. B6 mice (n=4 per group) were inoculated with C57SV tumor cells and treated with anti-PD-1 or isotype control. Nine days later, sites I-, II/III- and IV-specific T<sub>CD8</sub> were identified by ICS for IFN-γ and further evaluated for their surface expression levels of KLRG1 and CD127 (IL-7 receptor α chain). Representative dot plots are illustrated (A), and the percentages of CD127<sup>low</sup>KLRG1<sup>high</sup> short-lived effectors and CD127<sup>high</sup>KLRG1<sup>low</sup> memory precursors were determined within each T<sub>CD8</sub> population (B). Error bars represent SEM.
